# Supplementary material for: Influence of Dietary Advice Including Green Vegetables, Beef, and Whole Dairy Products on Recurrent Upper Respiratory Tract Infections in Children: A Randomized Controlled Trial
Source: PubMed Central journal article supplement (PMC7019298; doi:10.3390/nu12010272), 2020-01-20
Supplement: nutrients-12-00272-s001.pdf [file nutrients-12-00272-s001.pdf]

SUPPLEMENTAL MATERIALS

|                | Vit A (µg) |     | Vit C (mg) |     | Vit D (µg) |     | Vit E (mg) |     | Zinc (mg) |     | Iron (mg) |     |
|----------------|------------|-----|------------|-----|------------|-----|------------|-----|-----------|-----|-----------|-----|
|                | Diet       | RDA | Diet       | RDA | Diet       | RDA | Diet       | RDA | Diet      | RDA | Diet      | RDA |
| <b>Minimum</b> | 275        | 400 | 14         | 40  | 0.9        | 10* | 1.9        | 5.5 | 4.7       | 4   | 2.1       | 7   |
| <b>Maximum</b> | 445        |     | 18         |     | 0.9        |     | 2.6        |     | 7.9       |     | 2.8       |     |

\* Supplementation according to national guidelines. RDA = recommended daily allowance.

**Table S1.** Average daily nutritional values from the dietary advice alone<sup>19</sup>. This does not contain additional nutrients from other meals, snacks and beverages.

| Product                     | Frequency        | Portion size (1-4y) |
|-----------------------------|------------------|---------------------|
| Green vegetables            | 5 times per week | 50-100 g            |
| Beef                        | 3 times per week | 50-60 g             |
| Bovine milk                 | Daily            | 300 mL              |
| Whole dairy butter on bread | Daily            | 5 g/slice           |

**Table S2.** The dietary advice with age specific portion sizes<sup>20</sup>.

**Table S3.** Laboratory values of both groups at baseline (T0), at 6 months (T6) and p-values for differences between groups and in time.

|                                 | Dietary Advice<br>N=58 |      |         | Control Group<br>N=60 |      |         | p-value<br>(between<br>groups) |
|---------------------------------|------------------------|------|---------|-----------------------|------|---------|--------------------------------|
|                                 | T=0                    | T=6  | p-value | T=0                   | T=6  | p-value |                                |
| Hb (mmol/l)                     | 7.34                   | 7.59 | <0.001  | 7.36                  | 7.54 | 0.003   | 0.4                            |
| MCV (fl)                        | 77.9                   | 78.8 | 0.007   | 78.5                  | 78.9 | 0.18    | 0.3                            |
| Leucocytes (x10 <sup>9</sup> )  | 10.3                   | 9.26 | 0.024   | 9.35                  | 8.88 | 0.36    | 0.3                            |
| Lymphocytes (x10 <sup>9</sup> ) | 4.91                   | 4.34 | 0.007   | 4.81                  | 4.15 | 0.019   | 0.8                            |
| Neutrophils (x10 <sup>9</sup> ) | 4.04                   | 3.88 | 0.41    | 3.34                  | 3.57 | 0.54    | 0.3                            |
| CRP (mg/l)                      | 5.35                   | 2.46 | 0.044   | 2.98                  | 3.02 | 0.83    | 0.034                          |
| Ferritin (ug/l)                 | 43.3                   | 33.0 | 0.08    | 51.6                  | 41.5 | 0.38    | 0.7                            |
| Zinc (umol/l)                   | 11.2                   | 12.8 | <0.001  | 11.5                  | 12.3 | 0.033   | 0.2                            |
| IgA (g/l)                       | 0.62                   | 0.58 | 0.82    | 0.67                  | 0.68 | 0.27    | 0.5                            |
| IgG (g/l)                       | 7.25                   | 7.21 | 0.73    | 7.74                  | 7.49 | 0.40    | 0.7                            |
| IgM (g/l)                       | 0.97                   | 0.89 | 0.018   | 0.96                  | 0.89 | 0.48    | 0.4                            |
| IgE (g/l)                       | 33.9                   | 58.9 | 0.004   | 37.1                  | 62.0 | 0.31    | 0.16                           |
| Cholesterol (mmol/l)            | 3.99                   | 4.12 | 0.047   | 3.97                  | 3.97 | 0.93    | 0.20                           |
| Triglycerides (mmol/l)          | 1.46                   | 1.08 | 0.005   | 1.45                  | 1.20 | 0.042   | 0.6                            |
| HDL (mmol/l)                    | 1.11                   | 1.29 | <0.001  | 1.14                  | 1.21 | 0.16    | 0.11                           |
| LDL (mmol/l)                    | 2.22                   | 2.35 | 0.05    | 2.29                  | 2.28 | 0.85    | 0.20                           |
| Cholesterol/HDL ratio           | 3.95                   | 3.32 | <0.001  | 3.77                  | 3.47 | 0.06    | 0.4                            |

Normally distributed, student -t-test and mean values; Hb, MCV, leucocytes, lymphocytes, Neutrophils, IgA, IgG, Cholesterol, triglycerides, HDL, LDL, Cholesterol/HDL ratio

Not normally distributed, Mann Whitney test and median values; CRP, ferritin, IgM, IgE
